# Supplementary material
Source: publisher figshare collection journal article supplement (https://rs.figshare.com/ndownloader/files/15615029)
Supplement: Supplementary file 1 [file 15615029]

**Table S2. AICc scores for various thermal performance models fitting *Fv/Fm* data to temperature**. Lowest scores are shown in bold.

|  | *Acropora digitifera* | *Galaxea fascicularis* | *Montipora caliculata* | *Porites lobata* | *Oulastrea crispata* |
| --- | --- | --- | --- | --- | --- |
| Gaussian | **-390.1431** | **-195.4029** | -310.9269 | -340.2651 | -329.8462 |
| Mod Gaussian | -21.17955 | -47.3351 | -28.02881 | 82.58668 | 95.74342 |
| Weibull | -388.0198 | -189.64 | 390.7898 | -338.7177 | -327.7155 |
| Log Normal | -389.7209 | -190.2627 | -310.7567 | -337.2174 | -329.1099 |
| Linear | -381.3028 | -155.8495 | **-311.7339** | **-341.9408** | **-331.9613** |
